# Supplementary material for: ADORA2A rs5760423 and CYP1A2 rs762551 Polymorphisms as Risk Factors for Parkinson’s Disease
Source: MDPI journal article supplement (doi:10.3390/jcm10030381), 2021-01-20
Supplement: s1 [file s1]

**Table S1.** Baseline characteristics of studies investigating the association of the *ADORA2A* rs5760423 and *CYP1A2* rs762551 polymorphisms in PD patients and controls.

|                             |                                                      |                                   |                                                     |                                                                                                                                                                                                                                                                                                                                              | Cases                                    |      |                  | Controls               |      |                  |                                                                                       |
|-----------------------------|------------------------------------------------------|-----------------------------------|-----------------------------------------------------|----------------------------------------------------------------------------------------------------------------------------------------------------------------------------------------------------------------------------------------------------------------------------------------------------------------------------------------------|------------------------------------------|------|------------------|------------------------|------|------------------|---------------------------------------------------------------------------------------|
| Author (Year)               | Population                                           | ADORA2A rs5760423/CYP1A2 rs762551 | Including patients positive family history/HWE test | Diagnosis Assessment                                                                                                                                                                                                                                                                                                                         | Mean age $\pm$ SD/ Age of onset $\pm$ SD | n    | Sex Female/ male | Mean Age $\pm$ SD      | n    | Sex Female/ male | Main Results & Comments                                                               |
| Tan et al., (2007) [1]      | -                                                    | no/yes                            | -/cases and controls                                | UK Brain Bank criteria                                                                                                                                                                                                                                                                                                                       | 69.5 $\pm$ 10.3/63.5 $\pm$ 11.0 years    | 418  | 175/243          | 63.6 $\pm$ 11.3 years  | 468  | 241/227          | Negative                                                                              |
| Palacios et al., (2010) [2] | >90% Caucasian                                       | no/yes                            | -/yes                                               | Hughes AJ, Daniel SE, Lees AJ. Improved accuracy of clinical diagnosis of Lewy body Parkinson's disease. Neurology 2001;57(8):1497e9                                                                                                                                                                                                         | 48 (female), 60 (male)/-                 | 298  | 159/139          | 48 (female), 60 (male) | 1294 | 724/561          | Positive                                                                              |
| Popat et al., (2011) [3]    | mixed                                                | no/yes                            | yes/controls                                        | CAPIT/Hughes criteria<br>Neurology clinic record review, neurologic exam and diagnosis confirmed by study neurologist                                                                                                                                                                                                                        | 64.9 years/-                             | 1325 | 61.1 % male      | 68.4 years             | 1735 | 65.4% male       | Negative                                                                              |
| Chuang et al., (2016) [4]   | Non-Hispanic whites<br>Danish                        | yes /yes                          | yes/controls                                        | UK Brain Bank criteria (Hughes AJ, Daniel SE, Kilford L, et al. Accuracy of clinical diagnosis of idiopathic Parkinson's disease: a clinicopathological study of 100 cases. J Neurol Neurosurg Psychiatry. 1992;55(3):181–184.)<br><br>Gelb DJ, Oliver E, Gilman S. Diagnostic criteria for Parkinson disease. Arch Neurol. 1999;56(1):33–39 | 61.1 $\pm$ 9.5/-                         | 1556 | 59.9 % male      | 61.3 $\pm$ 9.7 years   | 1606 | 60.7% male       | Marginal Associations                                                                 |
| Kim et al., (2018) [5]      | Derived from 2 large prospective cohorts (NHS, HPFS) | no/yes                            | -/yes                                               | Based on medical records were requested from PD cases (after 2003 records reviewed by a neurologist specializing in movement disorders)                                                                                                                                                                                                      | -                                        | -    | -                | -                      | -    | -                | CYP1A2 rs762551 was associated with an increased risk in the NHS, but not in the HPFS |

PD, Parkinson's disease; ADORA2A, Adenosine Receptor Subtype A2a; CYP1A2, Cytochrome P450 1A2; NHS, Nurses' Health Study; HPFS, the Health Professionals Follow-up Study; OR, odds ratio; CI, confidence interval.

## REFERENCES

1. Tan EK, Chua E, Fook-Chong SM, Teo YY, Yuen Y, Tan L, et al. Association between caffeine intake and risk of Parkinson's disease among fast and slow metabolizers. *Pharmacogenetics and genomics*. 2007;17(11):1001-5.
2. Palacios N, Weisskopf M, Simon K, Gao X, Schwarzschild M, Ascherio A. Polymorphisms of caffeine metabolism and estrogen receptor genes and risk of Parkinson's disease in men and women. *Parkinsonism & related disorders*. 2010;16(6):370-5.
3. Popat RA, Van Den Eeden SK, Tanner CM, Kamel F, Umbach DM, Marder K, et al. Coffee, ADORA2A, and CYP1A2: the caffeine connection in Parkinson's disease. *European journal of neurology*. 2011;18(5):756-65.
4. Chuang YH, Lill CM, Lee PC, Hansen J, Lassen CF, Bertram L, et al. Gene-Environment Interaction in Parkinson's Disease: Coffee, ADORA2A, and CYP1A2. *Neuroepidemiology*. 2016;47(3-4):192-200.
5. Kim IY, O'Reilly É J, Hughes KC, Gao X, Schwarzschild MA, McCullough ML, et al. Interaction between caffeine and polymorphisms of glutamate ionotropic receptor NMDA type subunit 2A (GRIN2A) and cytochrome P450 1A2 (CYP1A2) on Parkinson's disease risk. *Movement disorders : official journal of the Movement Disorder Society*. 2018;33(3):414-20.
